# Supplementary material for: Detecting carcinoembryonic antigen based on the aggregation-induced emission enhancement effect
Source: Royal Society of Chemistry journal article supplement (doi:10.1039/d4cc04544k), 2024-01-01
Supplement: d4cc04544k1.pdf [file d4cc04544k1.pdf]

## Supporting Information

### **Detecting carcinoembryonic antigen based on aggregation-induced emission enhancement effect**

Yanjun Lu,<sup>a</sup> Mengqi Wang,<sup>a</sup> Yiwen Yang,<sup>\*a</sup> Qiukai Tang,<sup>b</sup> Yanbo Zeng,<sup>a</sup> Hailong Wang,<sup>a</sup> Lijie Zhang,<sup>a</sup> Chengrui Pan,<sup>a</sup> Changkun Hu,<sup>a</sup> Zhuowei Fu<sup>a</sup> and Lei Li<sup>\*a</sup>

<sup>a</sup> Jiaxing Key Laboratory of Molecular Recognition and Sensing, College of Biological, Chemical Sciences and Engineering, Jiaxing University, Jiaxing 314001, Zhejiang, China.

<sup>b</sup> Clinical Laboratory, Zhejiang Sian International Hospital, Jiaxing 314031, Zhejiang, China

#### **Corresponding author:**

**Yiwen Yang**

E-mail: [yangyiwen@mail.zjxu.edu.cn](mailto:yangyiwen@mail.zjxu.edu.cn)

**Lei Li**

E-mail: [lei.li@mail.zjxu.edu.cn](mailto:lei.li@mail.zjxu.edu.cn)

## **1. Experimental section**

### **1.1. Chemicals and Reagents.**

Carcinoembryonic antigen (CEA), alpha fetoprotein (AFP), and carbohydrate antigen 125 (CA125) were provided by Beijing Biosynthesis Biotechnology Co., Ltd. Human serum albumin (HSA) and bovine serum albumin (BSA) were purchased from Beijing J&K Science Co., Ltd. Immunoglobulin G (IgG) and vascular endothelial growth factor (VEGF) were obtained from Beijing Zhong Shan-Golden Bridge Biological Technology Co., Ltd. Protein tyrosine kinase-7 (PTK7) and immunoglobulin E (IgE) were purchased from Shanghai Hanxiang Biotechnology Co., Ltd. Prostate specific antigen (PSA) was obtained from Shanghai Linc-Bio Science Co., Ltd. CEA Apt (5'-ACTACAGCTTCAATT-3') was provided by Sangon Biotech (Shanghai) Co., Ltd.  $\text{Na}_2\text{HPO}_4$ ,  $\text{NaH}_2\text{PO}_4$ , [1,1'-biphenyl]-4,4'-diylidiboric acid, and 4,4'-bis(5,5-dimethyl-1,3,2-dioxaborinan-2-yl)-1,1'-biphenyl were provided by Shanghai Aladdin Biochemical Technology Co., Ltd. Methanol was provided by Sinopharm Chemical Reagent Co., Ltd. All chemicals used are of analytical grade and can be used without further purification. Ultrapure water was used in each experiment.

### **1.2. Instrumentation.**

The fluorescence spectrum was recorded by an F-7000 fluorescence spectrophotometer (Hitachi, Japan). The fluorescence lifetime was obtained on an FLS980 transient fluorescence spectrometer (Edinburgh, UK).

### **1.3 Preparation of the CEA-Apt/A complex**

First, 40  $\mu\text{L}$  of 50  $\mu\text{M}$  Compound A solution, 20  $\mu\text{L}$  of 10  $\mu\text{M}$  (or 0.02, 0.1, 0.2, 1, 2, 5, and 20  $\mu\text{M}$ ) CEA-Apt solution, and 340  $\mu\text{L}$  of 0.1 M PBS (pH = 7.4) were mixed evenly. After incubating the mixed solution at 37 °C for 1–10 min, the fluorescence intensity of the mixture was measured.

### **1.4 Detection of CEA**

First, 40  $\mu\text{L}$  of 50  $\mu\text{M}$  compound A solution and 20  $\mu\text{L}$  of 10  $\mu\text{M}$  CEA-Apt solution were mixed evenly. After incubation at 37 °C for 5 min, the fluorescence intensity of the mixture reached its maximum value. Then, 40  $\mu\text{L}$  of different concentrations (0.03, 1, 10, 20, 30, 50, 70, and 100 ng/mL) of CEA and 300  $\mu\text{L}$  of 0.1 M PBS (pH = 7.4) were added to the abovementioned mixture and mixed evenly. After incubation at 37 °C for 50 min, the fluorescence intensity of the mixed solution was tested.

### 1.5 Specificity and anti-interference of the aptasensor

AFP, IgG, VECF, HSA, BSA, CA125, IgE, PSA, and PTK7 were selected to evaluate the selectivity and anti-interference of aptasensors.

### 1.6 Practicability of the aptasensor

To evaluate the practicality of the aptasensor in complex biological matrices, the level of CEA in serum samples from patients with cancer was measured. First, the patient's serum was diluted 10 times with 0.1 M PBS (pH = 7.4) and then detected in accordance with the method presented in Section 1.4. The human serum samples were obtained from Zhejiang Sian International Hospital.

## 2. Supplemental Figures

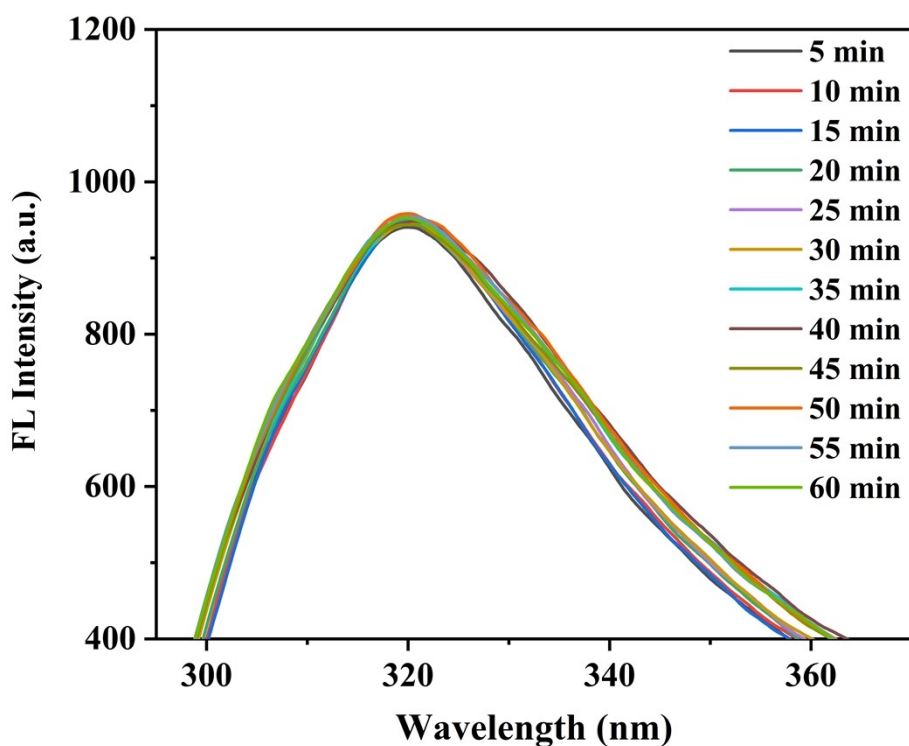

**Fig. S1** Fluorescence emission spectra of 5  $\mu$ M Compound A acquired over 60 min after excitation at 270 nm ( $\lambda_{em} = 320$  nm).

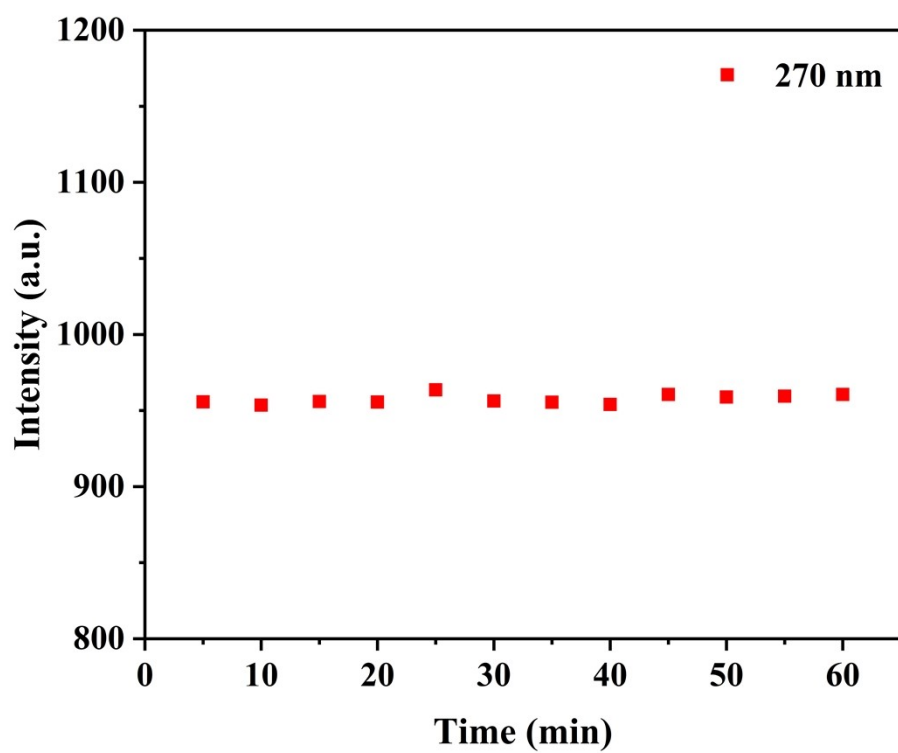

**Fig. S2** Fluorescence intensity of 5  $\mu$ M Compound A acquired over 60 min after excitation at 270 nm ( $\lambda_{em} = 320$  nm).

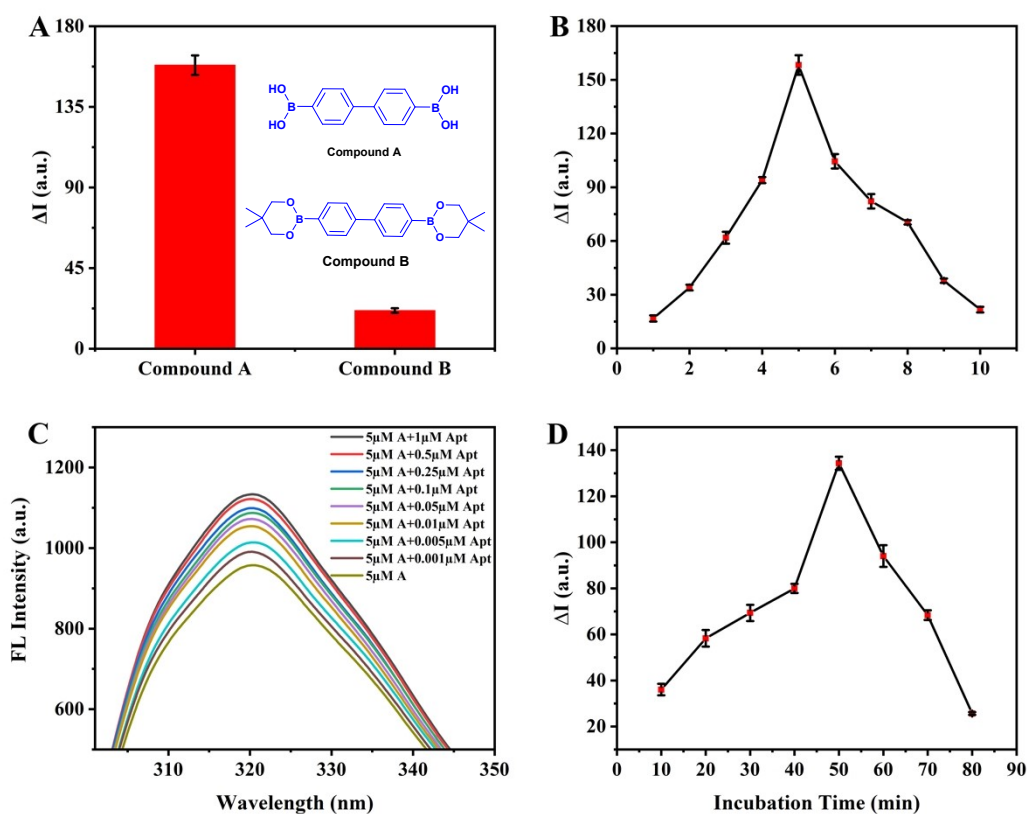

**Fig. S3** (A) Increase in the fluorescence intensity of Compound A (or B; 5  $\mu$ M) mixed with CEA-Apt (0.5  $\mu$ M; Compound A:  $\lambda_{\text{ex}} = 270$  nm and  $\lambda_{\text{em}} = 320$  nm; Compound B:  $\lambda_{\text{ex}} = 270$  nm and  $\lambda_{\text{em}} = 320$  nm). (B) Effect of the incubation time of CEA-Apt and Compound A on the fluorescence intensity of Compound A ( $\Delta I = I - I_0$ ,  $I_0$ , and  $I$  were the fluorescence intensities without CEA-Apt and with CEA-Apt). (C) Effect of CEA-Apt concentration on the fluorescence intensity of Compound A ( $\lambda_{\text{ex}} = 270$  nm,  $\lambda_{\text{em}} = 320$  nm). (D) Effect of CEA incubation time on the fluorescence intensity of Compound A ( $\Delta I = I_0 - I$ ,  $I_0$ , and  $I$  were the fluorescence intensities without CEA and with CEA).

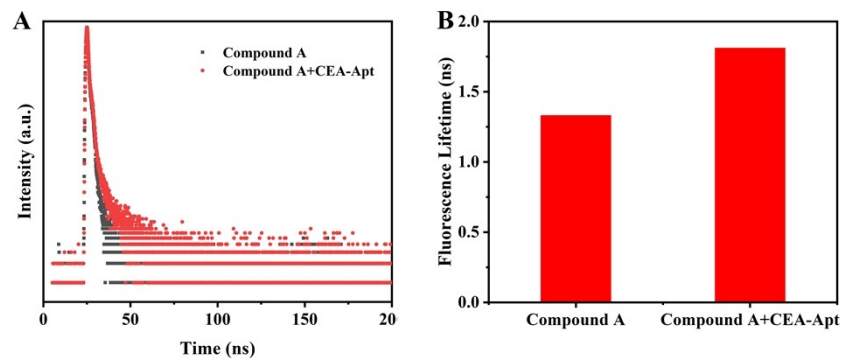

**Fig. S4** (A) Fluorescence lifetime decay curve of Compound A in 5  $\mu\text{M}$  Compound A solution or a mixture of 5  $\mu\text{M}$  Compound A and 0.5  $\mu\text{M}$  CEA-Apt; (B) Fluorescence lifetime of Compound A in 5  $\mu\text{M}$  Compound A solution or a mixture of 5  $\mu\text{M}$  Compound A and 0.5  $\mu\text{M}$  CEA-Apt.

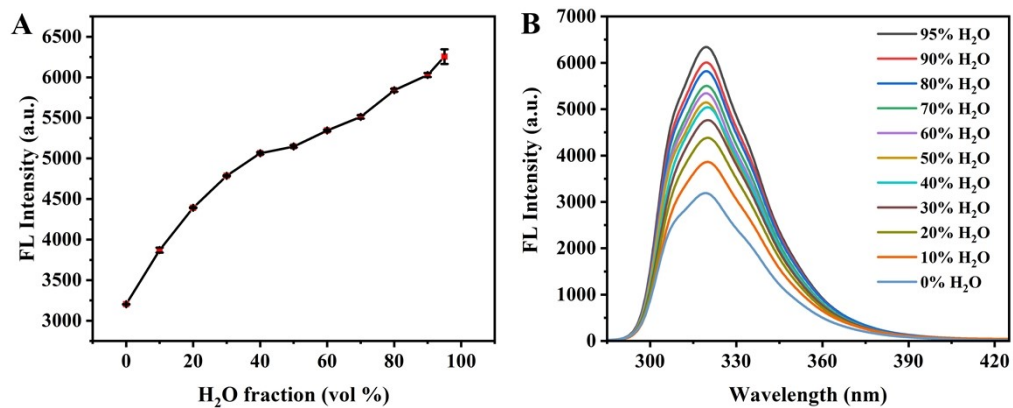

**Fig. S5** (A) Fluorescence intensity of Compound A in MeOH/H<sub>2</sub>O-mixed solutions with different volume fractions of H<sub>2</sub>O. (B) Fluorescence spectra of Compound A in MeOH/H<sub>2</sub>O-mixed solutions with different volume fractions of H<sub>2</sub>O.

**Table S1** Comparison between the proposed method and other CEA detection methods

| No. | Method                                                        | LOD<br>(ng mL <sup>-1</sup> ) | Linear range<br>(ng mL <sup>-1</sup> ) | References |
|-----|---------------------------------------------------------------|-------------------------------|----------------------------------------|------------|
| 1   | Bimetallic organic framework Cu/Uio-66<br>fluorescence method | 0.01                          | 0.01–0.3                               | 1          |
| 2   | Photoelectrochemical immunoassay                              | 0.0035                        | 0.01–40                                | 2          |
| 3   | Electrochemiluminescence biosensor                            | 2.51                          | 5–300                                  | 3          |
| 4   | Lateral flow immunoassay                                      | 0.023                         | -                                      | 4          |
| 5   | Abiotic fluorescent probe                                     | 0.2                           | 0–200                                  | 5          |
| 6   | DNA nanostructure-assisted detection                          | 10.8                          | 18–1800                                | 6          |
| 7   | Electrochemical sensor                                        | 0.08                          | 0.1–100000                             | 7          |
| 8   | Fluorescence immunoassay                                      | 0.05                          | 0.1–50                                 | 8          |
| 9   | Lateral flow assay                                            | 0.0144                        | 0.01–0.1                               | 9          |
| 10  | Electrochemiluminescence immunosensor                         | 0.0029                        | 0.005–500                              | 10         |
| 11  | Fluorescence aptasensors                                      | 0.001                         | 0.003–10                               | This work  |

## References

1. Y. Wu, X. Chen, X. Luo, M. Yang, C. Hou and D. Huo, *Anal. Chim. Acta*, 2021, **1183**, 339000.
2. X. Wang, H. Wang, X. Wan, M. Li and D. Tang, *Anal. Chim. Acta*, 2023, **1279**, 341826.
3. M. Mohammadniaei, M. Zhang, X. Qin, W. Wang, L. Pia, H. Gürbüz, S. H. Helalat, M. Naseri and Y. Sun, *Talanta*, 2024, **266**, 125087.
4. Y. Wang, J. Shen, R. Song, Q. Xu, X. Hu and Y. Shu, *Talanta*, 2024, **266**, 125017.
5. J.-S. Lee, I.-h. Song, S. D. Warkad, G. S. Yeom and S. B. Nimse, *Bioorg. Chem.*, 2022, **119**, 105490.
6. R. Tian, T. Weng, S. Chen, J. Wu, B. Yin, W. Ma, L. Liang, W. Xie, Y. Wang, X. Zeng, Y. Yin and D. Wang, *Bioelectrochemistry*, 2023, **149**, 108284.
7. L. P. T. Carneiro, N. S. Ferreira, A. P. M. Tavares, A. Pinto, A. Mendes and M. G. F. Sales, *Biosens. Bioelectron.*, 2021, **175**, 112877.
8. X. Liu, N. Wang, Y. Hou, H. Dong, W. Liang, X. Li and Y. Yuan, *Chem. Commun.*, 2024, **60**, 3978-3981.
9. J. Fox, D. V. B. Batchelor, H. Roberts, S. C. T. Moorcroft, E. M. A. Valleley, P. L. Coletta and S. D. Evans, *ACS Appl. Nano Mater.*, 2023, **6**, 17769-17777.

10. Y. Tang, B. Zhang, Y. Wang, F. Zhao and B. Zeng, *ACS Appl. Nano Mater.*, 2021, **4**, 7264-7271.
